# Supplementary material for: Proteome characterization of a human urothelial cell line resistant to the bladder carcinogen 4-aminobiphenyl
Source: PubMed Central journal article supplement (PMC1871571; doi:10.1186/1477-5956-5-6), 2007-05-03
Supplement: 1477-5956-5-6-S1.pdf [file 1477-5956-5-6-S1.pdf]

## **Additional file 1**

### **Expanded discussion**

In this material, we discuss the possible role that three proteins might have in conferring the apoptotic resistance phenotype to both 4-ABP resistant clones RT5 and RT11 as outlined in the main article.

#### **94kDa glucose-regulated protein; GRP94**

GRP94 is an oxidative stress-induced endoplasmic reticulum chaperone with  $\text{Ca}^{2+}$  binding properties and a component of the unfolded protein response (UPR). It may have an antiapoptotic effect and suppress oxidative apoptosis, probably protecting cells against flux in  $\text{Ca}^{2+}$  homeostasis, which could result in cell death [1]. Thus, the constitutive increase of GRP94 at the protein level in our resistant cell populations might contribute to their resistance to apoptosis.

#### **Lamin A/C; LMNA**

Lamin A/C is an intermediate filament type-V protein, component of the nuclear lamina, a filamentous protein network underlying the inner nuclear membrane.

Reduction of this protein by proteolytic degradation (caspase-dependent) has been recognized as a prelude to nuclear destruction in apoptosis [2].

It is possible to hypothesise that LMNA increased expression in RT5 and RT11 *versus* the parental RT112 might be an additional marker of the possibly lower apoptotic potential in the resistant clones.

#### **Fatty acid-binding protein, adipocyte; FABP4**

FABP4 is one of the fatty acid-binding proteins and plays a role in intracellular lipid transport and metabolism as well as in signal transduction [3]. FABPs proteins are

probably involved in the fatty acid-mediated apoptotic process *via* shuttling their ligands within cells. It has been recently shown that over-expression of FABP4 causes apoptosis in prostate cancer cells, and regulates cell proliferation via enhanced TNF $\alpha$  expression, suggesting the involvement of FABP4 in the gene expression regulation in the apoptotic process. [4]. Moreover apoptosis-linked enhancement of FABP4 has been reported in murine lymphocytes in response to dexamethasone treatment [5].

Therefore, the lower abundance of FABP4 might render our cells more resistant to apoptosis in response to 4-ABP exposure.

## References

1. Bando Y, Katayama T, Kasai K, Taniguchi M, Tamatani M, Tohyama M: **GRP94 (94 kDa glucose-regulated protein) suppresses ischemic neuronal cell death against ischemia/reperfusion injury.** *Eur J Neurosci* 2003, **18**: 829-840.
2. Burke B: **Lamins and apoptosis: a two-way street?** *J Cell Biol* 2001, **153**: F5-7.
3. Glatz JF, Borchers T, Spener F, van der Vusse GJ: **Fatty acids in cell signalling: modulation by lipid binding proteins.** *Prostaglandins Leukot Essent Fatty Acids* 1995, **52**: 121-127.
4. De Santis ML, Hammamieh R, Das R, Jett M: **Adipocyte-fatty acid binding protein induces apoptosis in DU145 prostate cancer cells.** *J Exp Ther Oncol* 2004, **4**: 91-100.
5. Abdelwahab SA, Owada Y, Kitanaka N, Adida A, Sakagami H, Ono M, Watanabe M, Spener F, Kondo H: **Enhanced expression of adipocyte-type fatty acid binding protein in murine lymphocytes in response to dexamethasone treatment.** *Mol Cell Biochem* 2006. DOI:10.1007/s11010-005-9050-1
