# Supplementary material for: Proteome characterization of a human urothelial cell line resistant to the bladder carcinogen 4-aminobiphenyl
Source: PubMed Central journal article supplement (PMC1871571; doi:10.1186/1477-5956-5-6), 2007-05-03
Supplement: 1477-5956-5-6-S3.pdf [file 1477-5956-5-6-S3.pdf]

Additional file 3  
Protein identification by Phenyx

| spot #                          | Identified protein                          | Symbol   | Swiss-Prot # | #pept. | Cov%     | Score   | sequence                        | charge             | m/z      | d m/z  | z-score | P-value  | Pos.    | #MC                       | Modif                                    |          |        |      |          |         |      |       |
|---------------------------------|---------------------------------------------|----------|--------------|--------|----------|---------|---------------------------------|--------------------|----------|--------|---------|----------|---------|---------------------------|------------------------------------------|----------|--------|------|----------|---------|------|-------|
| spot 46                         | Programmed cell death 6-interacting protein | PDCD6IP  | Q8WUM4       | 15     | 17       | 93.9    | K/FLTLAALQDGVINEEALSVTLEDR/V    | 2                  | 1253.304 | -0.656 | 11.4    | 4.32E-27 | 584-606 | 0                         | .....                                    |          |        |      |          |         |      |       |
|                                 |                                             |          |              |        |          |         | K/LANQAADYFGDAFK/Q              | 2                  | 767.464  | -1.599 | 10.7    | 4.38E-23 | 216-229 | 0                         | .....                                    |          |        |      |          |         |      |       |
|                                 |                                             |          |              |        |          |         | K/LANQAADYFGDAFK/Q              | 2                  | 765.844  | 0.021  | 10.1    | 3.07E-20 | 216-229 | 0                         | .....                                    |          |        |      |          |         |      |       |
|                                 |                                             |          |              |        |          |         | R/SVIEQGGIQTVDQLIK/E            | 2                  | 864.594  | -0.113 | 9.88    | 1.59E-19 | 423-438 | 0                         | .....                                    |          |        |      |          |         |      |       |
|                                 |                                             |          |              |        |          |         | K/FIQQTYPSGGEEQAQYCR/A          | 2                  | 1081.974 | -0.49  | 9.7     | 7.51E-19 | 24-41   | 0                         | .....Cys_CAM::                           |          |        |      |          |         |      |       |
|                                 |                                             |          |              |        |          |         | K/LALASLGYEK/S                  | 2                  | 532.929  | -0.126 | 9.57    | 5.11E-18 | 111-120 | 0                         | .....                                    |          |        |      |          |         |      |       |
|                                 |                                             |          |              |        |          |         | K/SCVLFNCAALASQIAAEQNLDNDEGLK/I | 3                  | 985.109  | -0.642 | 9.21    | 9.09E-17 | 121-147 | 0                         | .....Cys_CAM::Cys_CAM::                  |          |        |      |          |         |      |       |
|                                 |                                             |          |              |        |          |         | K/SLLSNLDEVK/K                  | 2                  | 559.359  | -0.05  | 8.32    | 4.24E-13 | 554-563 | 0                         | .....                                    |          |        |      |          |         |      |       |
|                                 |                                             |          |              |        |          |         | K/LANQAADYFGDAFK/Q              | 2                  | 764.319  | 1.546  | 7.84    | 1.65E-11 | 216-229 | 0                         | .....                                    |          |        |      |          |         |      |       |
|                                 |                                             |          |              |        |          |         | R/YDQICSEPK/F                   | 2                  | 708.384  | -0.055 | 7.32    | 9.68E-10 | 71-81   | 0                         | .....Cys_CAM::                           |          |        |      |          |         |      |       |
|                                 |                                             |          |              |        |          |         | K/FIQQTYPSGGEEQAQYCR/A          | 3                  | 721.969  | -0.644 | 6.9     | 2.12E-08 | 24-41   | 0                         | .....Cys_CAM::                           |          |        |      |          |         |      |       |
|                                 |                                             |          |              |        |          |         | K/KTSEVDLAKPLVK/F               | 3                  | 476.659  | -0.039 | 6.26    | 1.93E-06 | 11-23   | 1                         | .....                                    |          |        |      |          |         |      |       |
|                                 |                                             |          |              |        |          |         | R/SVIEQGGIQTVDQLIK/E            | 3                  | 576.789  | -0.133 | 6.13    | 4.00E-06 | 423-438 | 0                         | .....                                    |          |        |      |          |         |      |       |
|                                 |                                             |          |              |        |          |         | K/ELPELLQR/N                    | 2                  | 499.179  | 0.109  | 5.65    | 7.87E-05 | 439-446 | 0                         | .....                                    |          |        |      |          |         |      |       |
|                                 |                                             |          |              |        |          |         | K/SLLSNLDEVK/K                  | 2                  | 623.609  | -0.253 | 5.59    | 0.000107 | 554-564 | 1                         | .....                                    |          |        |      |          |         |      |       |
|                                 |                                             |          |              |        |          |         | spot146                         | Calreticulin       | CALR     | P27797 | 36      | 62       | 187     | F/LITNDEAYAEFFGNETWGVTK/A | 3                                        | 796.839  | -0.466 | 11.5 | 5.37E-27 | 314-334 | half | ..... |
|                                 |                                             |          |              |        |          |         |                                 |                    |          |        |         |          |         | T/NDEAYAEFFGNETWGVTK/A    | 2                                        | 1030.634 | -0.186 | 10.6 | 1.10E-22 | 317-334 | half | ..... |
| T/NDEAYAEFFGNETWGVTK/A          | 3                                           | 687.524  | -0.223       | 9.96   | 9.42E-20 | 317-334 |                                 |                    |          |        |         |          |         | half                      | .....                                    |          |        |      |          |         |      |       |
| K/SGTIFDNFLIT/N                 | 2                                           | 614.369  | -0.052       | 9.89   | 2.19E-19 | 306-316 |                                 |                    |          |        |         |          |         | half                      | .....                                    |          |        |      |          |         |      |       |
| E/EFGNETWGVTK/A                 | 2                                           | 634.379  | -0.077       | 9.22   | 1.24E-16 | 324-334 |                                 |                    |          |        |         |          |         | half                      | .....                                    |          |        |      |          |         |      |       |
| K/HEQNIDCGGGYVK/L               | 2                                           | 739.374  | -0.543       | 9.22   | 1.16E-16 | 82-94   |                                 |                    |          |        |         |          |         | 0                         | .....Cys_CAM::                           |          |        |      |          |         |      |       |
| K/FYQDEEKDKLQTSQDAR/F           | 3                                           | 696.534  | -0.207       | 8.84   | 3.87E-15 | 39-56   |                                 |                    |          |        |         |          |         | 2                         | .....                                    |          |        |      |          |         |      |       |
| K/EQFLDGDGWTSR/W                | 2                                           | 706.194  | -0.376       | 8.8    | 5.27E-15 | 8-19    |                                 |                    |          |        |         |          |         | 0                         | .....                                    |          |        |      |          |         |      |       |
| K/IDNSQVESGSLDDWDFLPPK/K        | 2                                           | 1196.864 | -0.811       | 8.48   | 2.49E-14 | 169-189 |                                 |                    |          |        |         |          |         | 0                         | .....                                    |          |        |      |          |         |      |       |
| K/IKDPDASKPEDWDER/A             | 2                                           | 901.099  | -0.175       | 7.63   | 7.37E-11 | 191-205 |                                 |                    |          |        |         |          |         | 1                         | .....                                    |          |        |      |          |         |      |       |
| K/HEQNIDCGGGYVK/L               | 3                                           | 492.644  | 0.245        | 7.5    | 3.21E-10 | 82-94   |                                 |                    |          |        |         |          |         | 0                         | .....Cys_CAM::                           |          |        |      |          |         |      |       |
| T/NDEAYAEFFGNETWGVTK/A          | 2                                           | 1030.959 | -0.511       | 7.49   | 1.87E-10 | 317-334 |                                 |                    |          |        |         |          |         | half                      | .....                                    |          |        |      |          |         |      |       |
| R/CKDDEFTHLY/T                  | 2                                           | 664.489  | -0.204       | 7.19   | 2.70E-09 | 146-155 |                                 |                    |          |        |         |          |         | half                      | .....Cys_CAM::                           |          |        |      |          |         |      |       |
| L/SASFEPPSNK/G                  | 2                                           | 557.444  | -0.18        | 7.11   | 5.54E-09 | 61-70   |                                 |                    |          |        |         |          |         | half                      | .....                                    |          |        |      |          |         |      |       |
| K/IDNSQVESGSLDDWDFLPPK/I        | 3                                           | 840.714  | -0.311       | 7.05   | 6.00E-09 | 169-190 |                                 |                    |          |        |         |          |         | 1                         | .....                                    |          |        |      |          |         |      |       |
| K/IDNSQVESGSLDDWDFLPPK/K        | 2                                           | 1196.594 | -0.541       | 7.05   | 2.03E-09 | 169-189 |                                 |                    |          |        |         |          |         | 0                         | .....                                    |          |        |      |          |         |      |       |
| K/IDNSQVESGSLDDWDFLPPK/K        | 3                                           | 798.054  | -0.35        | 7.02   | 7.27E-09 | 169-189 |                                 |                    |          |        |         |          |         | 0                         | .....                                    |          |        |      |          |         |      |       |
| N/SLDQDTMHDGSEYNIMFGPDICGPGTK/K | 3                                           | 1006.739 | -0.314       | 7      | 7.13E-09 | 99-125  |                                 |                    |          |        |         |          |         | half                      | .....Oxidation_M::Oxidation_M::Cys_CAM:: |          |        |      |          |         |      |       |
| F/GNETWGVTK/A                   | 2                                           | 496.319  | -0.073       | 6.81   | 5.03E-08 | 326-334 |                                 |                    |          |        |         |          |         | half                      | .....                                    |          |        |      |          |         |      |       |
| M/FGPDICGPGTK/K                 | 2                                           | 574.909  | -0.135       | 6.77   | 5.97E-08 | 115-125 |                                 |                    |          |        |         |          |         | half                      | .....Cys_CAM::                           |          |        |      |          |         |      |       |
| K/IDNSQVESGSLDDWDFLPPK/K        | 2                                           | 1196.349 | -0.296       | 6.7    | 2.45E-08 | 169-189 |                                 |                    |          |        |         |          |         | 0                         | .....                                    |          |        |      |          |         |      |       |
| R/QIDNPDYK/G                    | 2                                           | 496.979  | -0.241       | 6.68   | 1.23E-07 | 262-269 |                                 |                    |          |        |         |          |         | 0                         | .....                                    |          |        |      |          |         |      |       |
| K/GLQTSQDAR/F                   | 2                                           | 488.529  | -0.282       | 6.59   | 2.43E-07 | 48-56   |                                 |                    |          |        |         |          |         | 0                         | .....                                    |          |        |      |          |         |      |       |
| K/IKDPDASKPEDWDER/A             | 3                                           | 601.229  | -0.278       | 6.55   | 2.76E-07 | 191-205 |                                 |                    |          |        |         |          |         | 1                         | .....                                    |          |        |      |          |         |      |       |
| Y/TLIVRPDNTYEVK/I               | 2                                           | 774.979  | -0.554       | 6.38   | 6.55E-07 | 156-168 |                                 |                    |          |        |         |          |         | half                      | .....                                    |          |        |      |          |         |      |       |
| K/IDNSQVESGSLDDWDFLPPK/K        | 2                                           | 1196.434 | -0.381       | 6.27   | 4.05E-07 | 169-189 |                                 |                    |          |        |         |          |         | 0                         | .....                                    |          |        |      |          |         |      |       |
| K/IDNSQVESGSLDDWDFLPPK/K        | 3                                           | 798.054  | -0.35        | 6.24   | 1.50E-06 | 169-189 |                                 |                    |          |        |         |          |         | 0                         | .....                                    |          |        |      |          |         |      |       |
| Y/TLIVRPDNTYEVK/I               | 3                                           | 517.019  | -0.4         | 6.04   | 8.20E-06 | 156-168 |                                 |                    |          |        |         |          |         | half                      | .....                                    |          |        |      |          |         |      |       |
| K/LFNPNSLDQDTMHDGSEYNIM/F       | 2                                           | 1172.904 | -0.905       | 6.04   | 1.82E-06 | 95-114  |                                 |                    |          |        |         |          |         | half                      | .....Oxidation_M::                       |          |        |      |          |         |      |       |
| L/IVRPDNTYEVK/I                 | 2                                           | 667.849  | -0.49        | 5.99   | 9.25E-06 | 158-168 |                                 |                    |          |        |         |          |         | half                      | .....                                    |          |        |      |          |         |      |       |
| K/HEQNIDCGGGYVK/L               | 3                                           | 493.044  | -0.155       | 5.69   | 6.53E-05 | 82-94   |                                 |                    |          |        |         |          |         | 0                         | .....Cys_CAM::                           |          |        |      |          |         |      |       |
| T/DSKPEDWDKPEHIPDPDAK/K         | 3                                           | 740.719  | -0.372       | 5.68   | 5.02E-05 | 213-231 |                                 |                    |          |        |         |          |         | half                      | .....                                    |          |        |      |          |         |      |       |
| -1/EPAVYFK/E                    | 1                                           | 853.59   | -0.145       | 5.52   | 3.39E-05 | 1-07    |                                 |                    |          |        |         |          |         | 0                         | .....                                    |          |        |      |          |         |      |       |
| Y/FKEQFLDGDGWTSR/W              | 3                                           | 562.824  | -0.222       | 5.4    | 0.000304 | 6-19    | half                            | .....              |          |        |         |          |         |                           |                                          |          |        |      |          |         |      |       |
| K/GTWIHPIDNPEYSPDPS/I           | 2                                           | 1027.984 | -0.523       | 5.39   | 0.000191 | 270-287 | half                            | .....              |          |        |         |          |         |                           |                                          |          |        |      |          |         |      |       |
| K/KPEDWDEEMDGEWPEPPVIQNPYK/G    | 3                                           | 993.384  | -0.616       | 5.24   | 0.000457 | 232-255 | 0                               | .....Oxidation_M:: |          |        |         |          |         |                           |                                          |          |        |      |          |         |      |       |
| spot 206                        | Aldehyde dehydrogenase 1A3 a                | ALDH1A3a | P47895       | 20     | 25       | 108.6   | R/ANSTDYGLTAAVFTK/N             | 2                  | 780.134  | -0.243 | 10.5    | 2.76E-22 | 432-446 | 0                         | .....                                    |          |        |      |          |         |      |       |
|                                 |                                             |          |              |        |          |         | R/VFVEEQVSEFVR/R                | 3                  | 544.594  | -0.319 | 9.87    | 2.76E-19 | 320-332 | 0                         | .....                                    |          |        |      |          |         |      |       |
|                                 |                                             |          |              |        |          |         | K/TIPTDDNVVCFTR/H               | 2                  | 769.524  | -0.154 | 8.96    | 1.22E-15 | 155-167 | 0                         | .....Cys_CAM::                           |          |        |      |          |         |      |       |
|                                 |                                             |          |              |        |          |         | K/FATCNPSTR/E                   | 2                  | 527.299  | -0.056 | 8.26    | 6.61E-13 | 49-57   | 0                         | .....Cys_CAM::                           |          |        |      |          |         |      |       |
|                                 |                                             |          |              |        |          |         | R/VFVEEQVSEFVR/R                | 2                  | 816.254  | -0.345 | 8.08    | 2.20E-12 | 320-332 | 0                         | .....                                    |          |        |      |          |         |      |       |
|                                 |                                             |          |              |        |          |         | R/ELGEYALAEYTEVK/T              | 3                  | 539.039  | -0.104 | 7.83    | 2.56E-11 | 488-501 | 0                         | .....                                    |          |        |      |          |         |      |       |
|                                 |                                             |          |              |        |          |         | K/IAFTGSTVEGK/L                 | 2                  | 555.174  | 0.122  | 7.75    | 4.20E-11 | 253-263 | 0                         | .....                                    |          |        |      |          |         |      |       |
|                                 |                                             |          |              |        |          |         | R/YFAGWADK/I                    | 2                  | 479.329  | -0.102 | 7.58    | 1.88E-10 | 143-150 | 0                         | .....                                    |          |        |      |          |         |      |       |
|                                 |                                             |          |              |        |          |         | I/PTDDNVVCFTR/H                 | 2                  | 662.764  | -0.46  | 7.37    | 7.29E-10 | 157-167 | half                      | .....Cys_CAM::                           |          |        |      |          |         |      |       |
|                                 |                                             |          |              |        |          |         | K/AVEAAQVAFQR/G                 | 2                  | 596.169  | -0.849 | 7.27    | 1.72E-09 | 74-84   | 0                         | .....                                    |          |        |      |          |         |      |       |
|                                 |                                             |          |              |        |          |         | K/IAFTGSTVEGK/L                 | 2                  | 555.534  | -0.238 | 7.17    | 3.35E-09 | 253-263 | 0                         | .....                                    |          |        |      |          |         |      |       |
|                                 |                                             |          |              |        |          |         | K/IFINNEWHESK/S                 | 3                  | 473.174  | -0.272 | 7.15    | 4.78E-09 | 34-44   | 0                         | .....                                    |          |        |      |          |         |      |       |
|                                 |                                             |          |              |        |          |         | K/EEIFGPVQPILK/F                | 2                  | 685.654  | -0.264 | 7.08    | 5.63E-09 | 410-421 | 0                         | .....                                    |          |        |      |          |         |      |       |
|                                 |                                             |          |              |        |          |         | K/IFINNEWHESK/S                 | 2                  | 709.099  | -0.25  | 7.06    | 6.63E-09 | 34-44   | 0                         | .....                                    |          |        |      |          |         |      |       |
|                                 |                                             |          |              |        |          |         | K/ILELIESGK/K                   | 2                  | 565.369  | -0.024 | 6.71    | 9.36E-08 | 365-374 | 1                         | .....                                    |          |        |      |          |         |      |       |
|                                 |                                             |          |              |        |          |         | K/ILELIESGK/K                   | 2                  | 501.649  | -0.351 | 6.22    | 2.73E-06 | 365-373 | 0                         | .....                                    |          |        |      |          |         |      |       |
|                                 |                                             |          |              |        |          |         | R/ELGEYALAEYTEVK/T              | 2                  | 808.209  | -0.31  | 6.21    | 1.81E-06 | 488-501 | 0                         | .....                                    |          |        |      |          |         |      |       |
| K/AVEAAQVAFQR/G                 | 2                                           | 596.064  | -0.744       | 5.57   | 0.000123 | 74-84   | 0                               | .....              |          |        |         |          |         |                           |                                          |          |        |      |          |         |      |       |
| R/ANSTDYGLTAAVFTK/N             | 3                                           | 520.564  | -0.301       | 5.52   | 0.000164 | 432-446 | 0                               | .....              |          |        |         |          |         |                           |                                          |          |        |      |          |         |      |       |
| R/AKKEIFGPVQPILK/F              | 3                                           | 561.854  | -0.52        | 5.45   | 0.00024  | 407-421 | 1                               | .....              |          |        |         |          |         |                           |                                          |          |        |      |          |         |      |       |
| spot 207                        | Aldehyde dehydrogenase 1A3 b                | ALDH1A3b | P47895       | 19     | 28       | 123     | I/PTDDNVVCFTR/H                 | 2                  | 662.454  | -0.15  | 10.6    | 1.34E-22 | 157-167 | half                      | .....Cys_CAM::                           |          |        |      |          |         |      |       |
|                                 |                                             |          |              |        |          |         | R/ANSTDYGLTAAVFTK/N             | 2                  | 780.154  | -0.263 | 10.5    | 4.26E-22 | 432-446 | 0                         | .....                                    |          |        |      |          |         |      |       |
|                                 |                                             |          |              |        |          |         | K/FATCNPSTR/E                   | 2                  | 527.354  | -0.111 | 9.68    | 1.79E-18 | 49-57   | 0                         | .....Cys_CAM::                           |          |        |      |          |         |      |       |





Additional file 3  
Protein identification by Phenyx

|          |                                               |        |        |    |    |      |                              |   |          |        |      |          |         |   |                    |
|----------|-----------------------------------------------|--------|--------|----|----|------|------------------------------|---|----------|--------|------|----------|---------|---|--------------------|
|          |                                               |        |        |    |    |      | R/TDDEVVQREEEAIQLDGLNASQIR/E | 3 | 910.659  | -0.541 | 8.51 | 5.52E-14 | 23-46   | 1 | .....              |
|          |                                               |        |        |    |    |      | R/GLFDEYGSK/K                | 2 | 508.419  | -0.179 | 8.43 | 1.90E-13 | 375-383 | 0 | .....              |
|          |                                               |        |        |    |    |      | R/LISLTDENALSGNEELTVK/I      | 2 | 1025.404 | -1.87  | 8.08 | 1.74E-12 | 96-114  | 0 | .....              |
|          |                                               |        |        |    |    |      | K/NLLHVTDTGVGMTR/E           | 3 | 510.284  | 0.312  | 7.63 | 1.26E-10 | 122-135 | 0 | .....Oxidation_M:: |
|          |                                               |        |        |    |    |      | R/LSLNIDPAK/V                | 2 | 543.349  | -0.053 | 6.97 | 1.65E-08 | 724-733 | 0 | .....              |
|          |                                               |        |        |    |    |      | K/FAFQAEVNR/M                | 2 | 541.434  | -0.159 | 6.96 | 1.57E-08 | 55-63   | 0 | .....              |
|          |                                               |        |        |    |    |      | K/SGTSEFLN/K                 | 2 | 491.804  | -0.058 | 6.16 | 3.68E-06 | 148-156 | 0 | .....              |
| spot 906 | NADH-ubiquinone oxidoreductase 30 kDa subunit | NDUFS3 | O75489 | 10 | 46 | 84.3 | K/QLSAFGEYVAEILPK/Y          | 2 | 833.249  | -0.3   | 12.4 | 1.06E-31 | 21-35   | 0 | .....              |
|          |                                               |        |        |    |    |      | K/DFPLSGYVELR/Y              | 2 | 648.904  | -0.569 | 10.9 | 6.38E-24 | 165-175 | 0 | .....              |
|          |                                               |        |        |    |    |      | K/SLVDLTAVDVPTTR/Q           | 2 | 693.554  | -0.168 | 10.5 | 3.50E-22 | 74-86   | 0 | .....              |
|          |                                               |        |        |    |    |      | R/VVAEPVELAQEFR/K            | 3 | 496.379  | -0.111 | 9.55 | 6.72E-18 | 183-195 | 0 | .....              |
|          |                                               |        |        |    |    |      | K/TYTDELTPIEASVVFKA          | 2 | 950.739  | -0.256 | 8.91 | 1.44E-15 | 109-125 | 0 | .....              |
|          |                                               |        |        |    |    |      | R/VVAEPVELAQEFR/K            | 2 | 744.154  | -0.255 | 8.67 | 1.59E-14 | 183-195 | 0 | .....              |
|          |                                               |        |        |    |    |      | K/RVVAEPVELAQEFR/K           | 3 | 548.389  | -0.087 | 8.58 | 4.51E-14 | 182-195 | 1 | .....              |
|          |                                               |        |        |    |    |      | R/KFDLNSPWAEFPVYR/Q          | 3 | 623.794  | -0.145 | 8.4  | 2.12E-13 | 196-210 | 1 | .....              |
|          |                                               |        |        |    |    |      | R/LTDYGFEGHPPFR/K            | 3 | 518.129  | -0.204 | 8.22 | 1.03E-12 | 151-163 | 0 | .....              |
|          |                                               |        |        |    |    |      | K/AANWYER/E                  | 2 | 455.314  | -0.099 | 6.83 | 4.27E-08 | 126-132 | 0 | .....              |
| spot 912 | Triosephosphate isomerase                     | TPI    | P60174 | 12 | 42 | 77.1 | K/SNVSDAVAQSTR/I             | 2 | 617.904  | -0.099 | 12.6 | 6.71E-33 | 194-205 | 0 | .....              |
|          |                                               |        |        |    |    |      | R/HVFGESDELIGQK/V            | 2 | 730.189  | -0.324 | 11.1 | 6.54E-25 | 100-112 | 0 | .....              |
|          |                                               |        |        |    |    |      | R/IYGGSVTGATCK/E             | 2 | 664.264  | -0.424 | 9.76 | 7.33E-19 | 206-218 | 0 | .....Cys_CAM::     |
|          |                                               |        |        |    |    |      | K/DCGATWVVLGHSER/R           | 2 | 793.939  | -0.066 | 8.76 | 6.91E-15 | 85-98   | 0 | .....Cys_CAM::     |
|          |                                               |        |        |    |    |      | K/DCGATWVVLGHSER/R           | 3 | 529.879  | -0.295 | 8.71 | 1.63E-14 | 85-98   | 0 | .....Cys_CAM::     |
|          |                                               |        |        |    |    |      | R/HVFGESDELIGQK/V            | 3 | 487.044  | -0.132 | 8.1  | 3.15E-12 | 100-112 | 0 | .....              |
|          |                                               |        |        |    |    |      | R/RHVFGESDELIGQK/V           | 3 | 539.084  | -0.138 | 7.92 | 1.23E-11 | 99-112  | 1 | .....              |
|          |                                               |        |        |    |    |      | K/VTNGAFTGEISPGMIK/D         | 2 | 820.104  | -0.69  | 7.86 | 1.33E-11 | 69-84   | 0 | .....Oxidation_M:: |
|          |                                               |        |        |    |    |      | K/VIADNVKDWISK/V             | 2 | 637.994  | -0.153 | 6.85 | 3.30E-08 | 149-159 | 1 | .....              |
|          |                                               |        |        |    |    |      | K/IAVAAQNCYK/V               | 2 | 569.464  | -0.174 | 6.43 | 6.19E-07 | 59-68   | 0 | .....Cys_CAM::     |
|          |                                               |        |        |    |    |      | K/TATPQQAQEVHEK/L            | 3 | 489.919  | -0.34  | 5.65 | 8.29E-05 | 175-187 | 0 | .....              |
|          |                                               |        |        |    |    |      | K/VTNGAFTGEISPGMIK/D         | 2 | 812.299  | -0.882 | 5.62 | 6.61E-05 | 69-84   | 0 | .....              |
